# Supplementary material
Source: Research Square preprint supplement (doi:10.21203/rs.3.rs-9913605/v1)
Supplement: Supplementary file 1 [file a05629eb8953231bf147d3b5.docx]

**Supplementary Appendix 1**

**Standardised LLM Classification Prompt**

Applied identically to ChatGPT (GPT-5.2 Instant), Gemini (Gemini 3.1 Pro), Kimi (K2.5), and DeepSeek (V3.2); accessed February 23–26, 2026 via consumer web interfaces.

**Expert Role Assignment**

You are an expert in:

- Endodontics
- Dental education
- Medical assessment
- Educational taxonomies
- Cognitive complexity analysis

**Dataset Description**

I will provide 200 multiple-choice endodontic questions from the Turkish Dentistry Specialty Examination (DUS) administered by ÖSYM between 2012 and 2025.

**Background**

- DUS is a national postgraduate specialty entrance examination in dentistry in Turkey.
- Questions are prepared based on internationally recognised dental textbooks selected by ÖSYM.
- Questions are written in Turkish.
- The exam assesses theoretical knowledge, clinical reasoning, and applied endodontic decision-making.
- Candidates are ranked according to their examination scores for specialty placement.

**Classification Task**

For EACH question, classify cognitive demand according to all three frameworks listed below. Questions were presented with all answer options included, in annual batches corresponding to the original examination year.

**1. Revised Bloom’s Taxonomy**

- Remember
- Understand
- Apply
- Analyse
- Evaluate
- Create

**2. SOLO Taxonomy**

- Pre-structural
- Uni-structural
- Multi-structural
- Relational
- Extended Abstract

**3. Miller’s Pyramid**

- Knows
- Knows How
- Shows How
- Does

**Important Methodological Instructions**

- Do not force higher cognitive levels artificially.
- Use conservative taxonomy coding.
- Differentiate carefully between:
- Analyse vs. Evaluate
- Knows vs. Knows How
- A standard single-best-answer MCQ generally should not be classified as Miller ‘Shows How’.
- Bloom ‘Evaluate’ should only be used if the question genuinely requires judgement between competing alternatives using explicit criteria.

**Note on Prompt Application**

This prompt was applied identically and in full to each of the four LLMs. Each annual batch of questions was submitted in a dedicated incognito browser session to eliminate cross-session memory and personalisation effects. No replicate sessions were conducted. The prompt text above represents the complete instruction set provided to each LLM prior to question presentation.
